# Supplementary material for: Trophic transfer of TiO2 nanoparticles from marine microalga (Nitzschia closterium) to scallop (Chlamys farreri) and related toxicity
Source: Royal Society of Chemistry journal article supplement (doi:10.1039/c6en00365f), 2016-12-01
Supplement: c6en00365f1.pdf [file c6en00365f1.pdf]

1 **Supporting information**

2

3 **Trophic transfer of TiO<sub>2</sub> nanoparticles from marine microalga**  
4 **(*Nitzschia closterium*) to scallop (*Chlamys farreri*) and related**  
5 **toxicity**

6

7 Zhenyu Wang,<sup>a,b</sup> Bin Xia,<sup>a,c</sup> Bijuan Chen,<sup>c</sup> Xuemei Sun,<sup>c</sup> Lin Zhu,<sup>c</sup> Jian Zhao,<sup>a,b,\*</sup> Peng

8 Du,<sup>d</sup> Baoshan Xing<sup>d,\*</sup>

9

10 <sup>a</sup> Institute of Costal Environmental Pollution Control, and Ministry of Education Key  
11 Laboratory of Marine Environment and Ecology, Ocean University of China, Qingdao  
12 266100, China;

13 <sup>b</sup>Laboratory of Marine Ecology and Environmental Science, Qingdao National Laboratory for  
14 Marine Science and Technology, Qingdao 266071, China

15 <sup>c</sup> Yellow Sea Fisheries Research Institute, Chinese Academy of Fishery Sciences, Qingdao  
16 266071, China

17 <sup>d</sup>Stockbridge School of Agriculture, University of Massachusetts, Amherst, MA 01003, USA

18

19 \*Corresponding author

20 Tel.: +1 413 545 5212

21 *E-mail address:* bx@umass.edu (Dr. Baoshan Xing); zhaojian047@126.com (Dr. Jian Zhao)

22

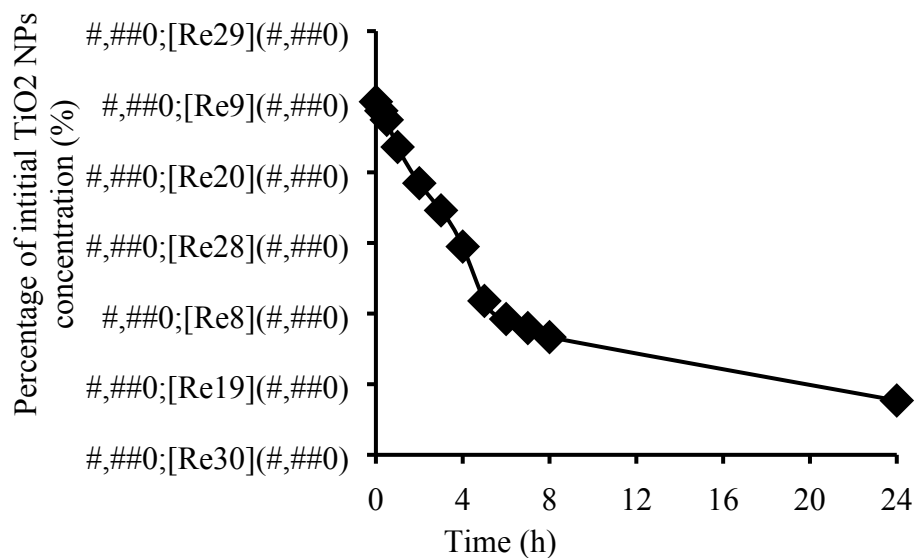

23

24 **Figure S1.** Sedimentation of TiO<sub>2</sub> NPs aggregates (1 mg/L) in filtered seawater for 24  
 25 h. The ordinate represents the percentage of initial TiO<sub>2</sub> NPs remaining in the water  
 26 column.

27

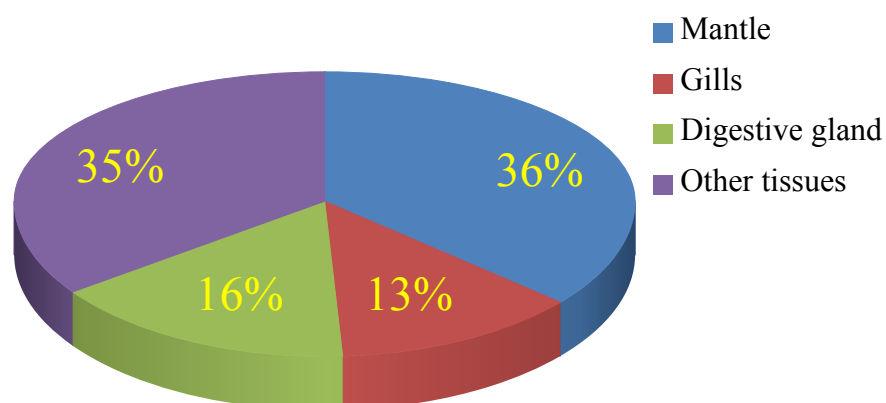

28

29 **Figure S2.** Mass percentages (% dry weight) of gills, digestive gland, mantle and  
 30 other tissues in the whole scallops.

31

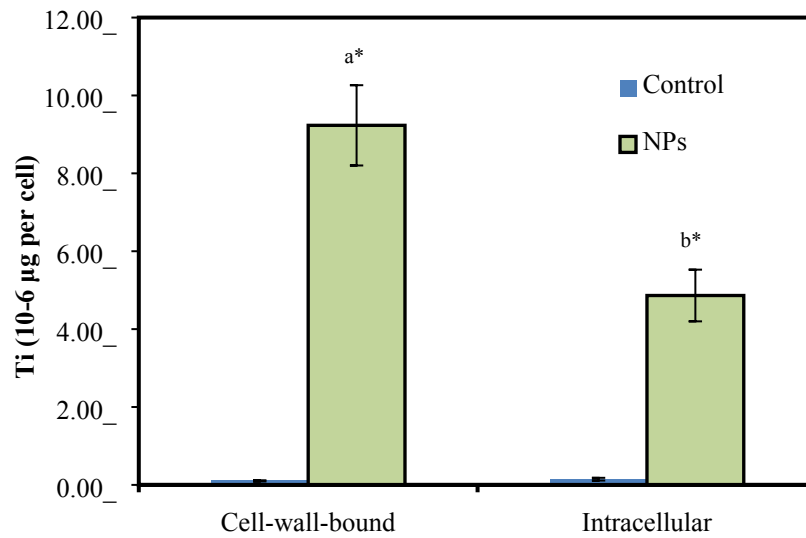

32

33 **Figure S3.** Intracellular and cell-wall-bound Ti contents of controls and cells treated  
 34 by 1 mg/L  $\text{TiO}_2$  NPs after 24 h exposure. Asterisk indicates significant differences  
 35 between  $\text{TiO}_2$  NPs treatment and controls ( $p < 0.05$ ). Different letters (a–b) indicate  
 36 significant differences between the intracellular and cell wall-bound Ti contents.

37

38

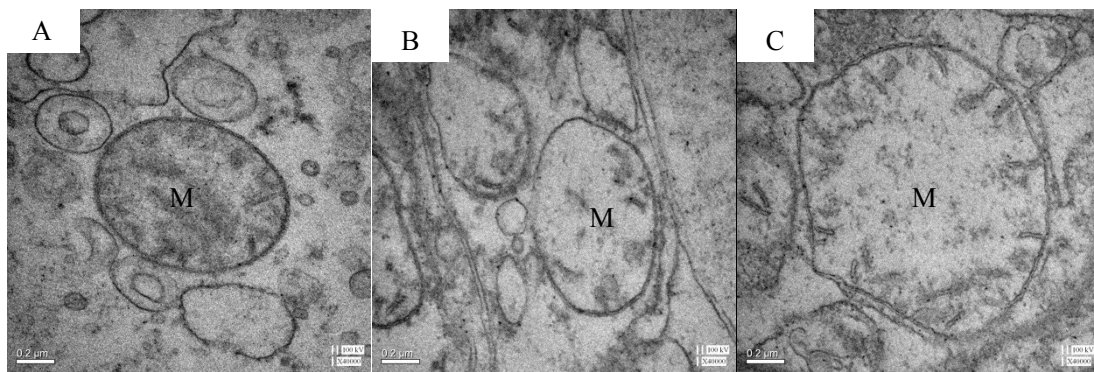

39

40 **Figure S4.** TEM images of mitochondria in digestive gland of scallops. (A) Control;  
41 (B) Dietary exposure; (C) Aqueous exposure. M: Mitochondria

42

43

44

45 **Table S1.** Hydrodynamic size, zeta potential, and polydispersity index (PDI) of TiO<sub>2</sub>  
 46 NPs in ultrapure water and filtered seawater after 6 h.

| Medium            | Hydrodynamic size<br>(nm) <sup>a</sup> | Zeta potential<br>(mV) <sup>a</sup> | PDI <sup>a</sup> | Purity (%) <sup>b</sup> | Crystalline<br>structure <sup>b</sup> |
|-------------------|----------------------------------------|-------------------------------------|------------------|-------------------------|---------------------------------------|
| Ultrapure water   | 238.1 ± 17.7                           | -11.0 ± 1.3                         | 0.38 ± 0.07      | >99.5                   | Anatase: 98.6%                        |
| Filtered seawater | 1354 ± 245                             | -9.3 ± 0.5                          | 0.89 ± 0.03      |                         | Rutile: 1.4%                          |

47 <sup>a</sup>: Measured in ultrapure water and filtered seawater (pH 7.9);

48 <sup>b</sup>: Characterized and provided by our previous study (Xia et al., 2015).

49

## 50 **References:**

51 B. Xia, B. Chen, X. Sun, K. Qu, F. Ma and Du M, Interaction of TiO<sub>2</sub> nanoparticles  
 52 with the marine microalga *Nitzschia closterium*: Growth inhibition, oxidative stress  
 53 and internalization, *Sci. Total. Environ.*, 2015, **508**, 525-533.

54
